# Effects of Equine-Assisted Therapy on Recovery after Stroke – A Systematic Review

Bettina Hanna Trunk\*, Alireza Gharabaghi\*

Institute for Neuromodulation and Neurotechnology, University Hospital and  
University of Tübingen, Tuebingen, Germany

\*Correspondence

Institute for Neuromodulation and Neurotechnology, University Hospital and University  
of Tuebingen, Otfried-Mueller-Str.45, 72076 Tuebingen, Germany. Telephone: +49  
7071 29-85197. Email addresses: [bettina.trunk@uni-tuebingen.de](mailto:bettina.trunk@uni-tuebingen.de),  
[alireza.gharabaghi@uni-tuebingen.de](mailto:alireza.gharabaghi@uni-tuebingen.de)

NOTE: This preprint reports new research that has not been certified by peer review and should not be used to guide clinical practice.

## Abstract

*Background* Equine-Assisted Therapy (EAT) can boost well-being and recovery of patients with neurological or psychiatric disorders.

*Objective* The goal of this systematic review is to gain a better understanding of the effects of EAT on recovery after stroke.

*Methods* A systematic literature search was performed in the following databases: PubMed, Web of Science and Scopus. Furthermore, reference lists from the articles included were screened. English-written articles published between 2000-2023 that reported on health-related effects of EAT (applied with both horses and riding simulators) on stroke recovery in patients aged between 18 and 85 were included. Methodological quality was assessed by the Mixed Methods Appraisal Tool.

*Results* Following the screening of 2030 and retrieval of 33 articles respectively, 17 reports were included in this systematic review (437 patients, mean age range: 40 – 70 years). Since several of these studies lacked important methodological information, the overall methodological quality varied. Fourteen of the articles reported physical (balance, gait, postural coordination, activities of daily living (ADL), lower extremity motor impairment, motor function and hand strength), while six studies reported psychological (cognition, quality of life (QoL), depression and perception of the intervention) findings. Only two studies reported physiological findings (muscle thickness and trunk muscle activity). In general, the findings suggest positive effects of EAT on stroke recovery in each domain, whereas the most consistent beneficial effects were reported for balance and gait.

*Conclusion* EAT appears to be a promising multimodal intervention for the recovery of different functions after stroke. However, evidence is sparse and methodological

39 quality limited. Future research should investigate the effects of EAT on stroke  
40 recovery more systematically.

41

42 **Key words (max. 6)**

43 Equine-assisted therapy, Hippotherapy, Therapeutic Horse Riding, Stroke, Recovery,  
44 Multimodal Intervention

## Introduction

One out of four people over the age of 25 are expected to suffer from a stroke within their lifetime. (Feigin *et al.*, 2022) Stroke is a devastating disease which can lead to various, severe, and persistent symptoms, such as hemiparesis of the upper and lower extremity, spasticity, aphasia, and other cognitive impairments. (Brewer *et al.*, 2013) Due to natural reorganization processes, patients can, to some extent, recover lost functions within the first six months following a stroke. However, after this period, no further recovery is expected with current therapies. (Murphy and Corbett, 2009; Grefkes and Ward, 2014) Persistent disabilities have a drastic impact of the patients' quality of life, as they are often dependent on caregivers, even for simple activities of daily life. (Kim *et al.*, 1999; Feigin *et al.*, 2015) Thus, novel interventions are required. (Achten *et al.*, 2012)

Multimodal interventions, such as Equine-Assisted Therapy (EAT), have been proposed to engage patients in concurrent physical, sensory, cognitive and social activities, therefore supporting recovery from multiple symptoms. (Pekna *et al.*, 2012, Bunketorp-Käll *et al.*, 2017b) While riding a horse at walking speed, the three-dimensional movement of the horse's back leads to a rhythmic sensorimotor stimulation of the patients that is comparable to human gait. (Uchiyama *et al.*, 2011; Garner and Rigby, 2015, Bunketorp-Käll *et al.*, 2017b; Guindos-Sanchez *et al.*, 2020) At around 70-100 steps/minute, the rider is passively moved. (Uchiyama *et al.*, 2011) Patients must therefore constantly adjust to small postural changes. (Rigby and Grandjean, 2016) EAT can be performed with both riding simulators and horses. (Baek and Kim, 2014, Bunketorp-Käll *et al.*, 2017b) The latter in particular provides an enriched environment, ultimately leading to a higher training motivation and improved

psychological outcome. (Bunketorp-Käll *et al.*, 2017b; Vive *et al.*, 2022; Ward *et al.*, 2022)

Robust benefits of EAT following severe neurological disability or illness were previously reported (Viruega *et al.*, 2022); usually in children with cerebral palsy (Deutz *et al.*, 2018; Guindos-Sanchez *et al.*, 2020; Heussen and Häusler, 2022), but also in patients with multiple sclerosis (Stergiou *et al.*, 2017), spinal cord injury (Lechner *et al.*, 2007), ADHD (Hyun *et al.*, 2016; Yoo *et al.*, 2016), chronic pain (Collado-Mateo *et al.*, 2020), Down syndrome (Portaro *et al.*, 2020), cancer (Viruega *et al.*, 2023), or stroke (Beinotti *et al.*, 2013, Bunketorp-Käll *et al.*, 2017b). EAT was found to benefit physical function, i.e., improved gait, balance, or gross motor function, as well as to decrease spasticity. (Guindos-Sanchez *et al.*, 2020; Badin *et al.*, 2022) In addition, psychological factors, such as quality of life and depression were found to be improved in various cohorts. (Badin *et al.*, 2022; Viruega *et al.*, 2023) However, only little attention has been paid to the underlying brain physiology. (Yoo *et al.*, 2016)

In view of the fact that the above-mentioned symptoms are common after stroke, EAT appears to be a promising multimodal intervention that may facilitate recovery in stroke patients. (Bunketorp-Käll *et al.*, 2017b) In addition, EAT provides a much higher training intensity than other interventions. This has been proposed to be vital to boosting further recovery in chronic stroke patients (Krakauer *et al.*, 2012; Lohse *et al.*, 2014; Solomonow-Avnon and Mawase, 2019; Ward *et al.*, 2019). However, previous research of EAT in stroke patients is sparse and, to the best of our knowledge, no systematic review has yet synthesized the effects of EAT on different domains of stroke recovery yet.

We therefore aim to 1) provide an overview of the existing literature on EAT in stroke patients; 2) evaluate the methodological quality of these studies; 3) synthesize the

- 94 effects of EAT on health-related outcomes (physical, psychological, and physiological  
95 domains) during recovery after stroke.

## Methods

This systematic review was conducted in accordance with the Physiotherapy Evidence Database (PRISMA) guidelines (Page *et al.*, 2021).

### ***Eligibility criteria***

Inclusion criteria were defined based on the PICO approach (population, intervention, control, outcome).

The patient population of interest were stroke patients between 18 and 80 years of age. We included intervention studies published between 2000 and 2023 in which EAT had been applied (independent of the precise intervention, e.g., therapeutic horse riding or hippotherapy) in both horses and riding simulators. Furthermore, studies that included different patient cohorts were taken into consideration only if they were mainly comprised of stroke patients. Moreover, we took only those studies into account in which health-related outcomes (i.e., in physical, psychological, and physiological domains) were investigated.

We did not consider manuscripts in any language other than English, conference work, theses, case reports, and study protocols.

### ***Search strategy***

A search between January 2000 and April 2023 was conducted in the PubMed, Web of Science and Scopus databases. Furthermore, reference lists were cross-checked for potentially missed studies. Our search included search terms related to EAT and stroke and were connected using Boolean operators. The complete syntax for each library can be found in Supplemental Material 1.

## **Selection process**

All search results were downloaded to Mendeley with title, authors and abstract. Duplicates were then removed. Titles and abstracts were screened for eligibility by one author (BHT). Full-text copies of the relevant studies were then downloaded and screened for eligibility. When in doubt, the other author (AG) was consulted for clarification.

## **Data extraction**

The following data were extracted from the studies selected: publication characteristics (authors, year, and location), aim of the study, study characteristics (age, sample size, time since stroke), intervention (details of experimental and control group, and dose of treatment), outcome measures, general findings. The data was organized in an Excel spreadsheet.

## **Quality assessment**

The quality of the included studies was assessed using the Mixed Methods Appraisal Tool (MMAT) version 2018 (Hong *et al.*, 2018). This tool was designed for evaluating the quality of studies that used mixed methods (randomized controlled trials, non-randomized trials, quantitative descriptive studies, and mixed methods studies) to be included in systematic reviews. (Hong *et al.*, 2018) Criteria that were met were scored by a “Y”, whereas those that were not met were scored with a “N” or a “U” in the event of missing information. No studies were excluded based on their methodological quality.



## Results

### Study selection

Our systematic literature yielded 3107 articles. Then, 1077 duplicates were removed. After screening, 1996 articles were excluded, and 33 articles were retrieved and checked for eligibility. Finally, 17 articles met the inclusion criteria (Fig. 1). The studies involved are summarized in Tab. 1.

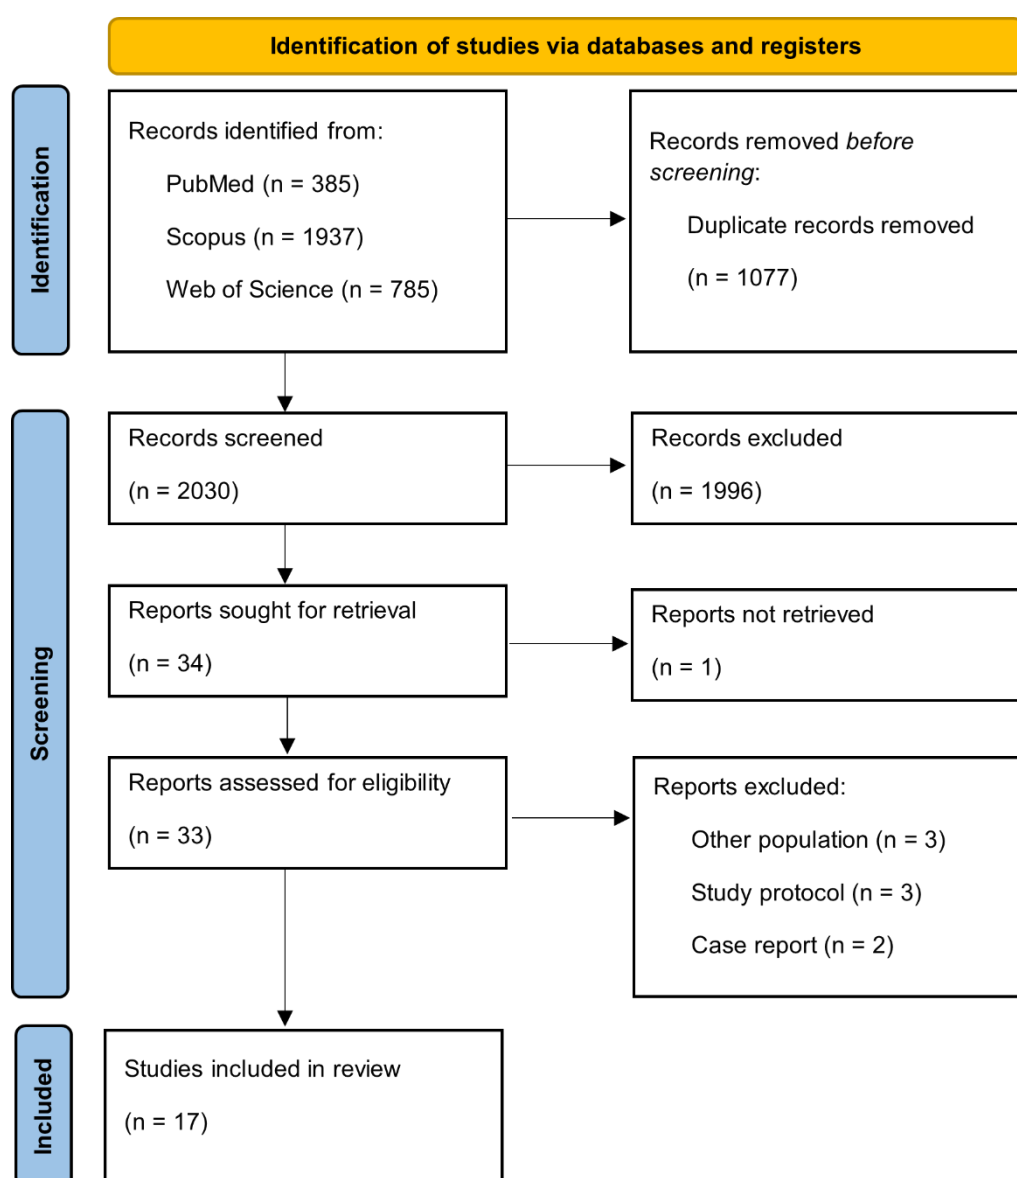

**Fig. 1. Flow diagram of enrolment based on PRISMA guidelines.**

**Tab. 1. Overview of the studies included.** For each study, location, patient population, intervention, information about horse/ simulator, outcome domain and measures as well as key findings and study quality are summarized.

| Study and Location                        | Patient population                                                                    | Intervention                                                                                                                |                                                                                                                                  | Horse     | Outcome domain                           | Outcome measures                                                                                                                                                                  | Key findings                                                                                                                                                                                                                                                                                                                                                |
|-------------------------------------------|---------------------------------------------------------------------------------------|-----------------------------------------------------------------------------------------------------------------------------|----------------------------------------------------------------------------------------------------------------------------------|-----------|------------------------------------------|-----------------------------------------------------------------------------------------------------------------------------------------------------------------------------------|-------------------------------------------------------------------------------------------------------------------------------------------------------------------------------------------------------------------------------------------------------------------------------------------------------------------------------------------------------------|
|                                           | <i>N</i><br>Age<br>Time since stroke                                                  | <i>N</i><br>Experimental<br>Dose                                                                                            | <i>N</i><br>Control<br>Dose                                                                                                      |           |                                          |                                                                                                                                                                                   |                                                                                                                                                                                                                                                                                                                                                             |
| (Baek and Kim, 2014)<br>Korea             | N = 30<br>55.1±6.1 years (EG)<br><br>56.5±7.5 years (CG)<br><br>Not specified         | N = 15<br>CNDS + horse riding training<br><br>3 times/ week for 8 weeks, 30 min CNSD therapy + 30 min horse riding training | N = 15<br>CNDS + trunk exercises with Swiss balls<br><br>3 times/ week for 8 weeks, 30 min CNSD therapy + 30 min trunk exercises | Simulator | Physical<br><br>Physiological            | <ul style="list-style-type: none"> <li>Balance (BioRescue System)</li> <li>Muscle thickness of abdominal muscles on both sides (Ultrasonic imaging)</li> </ul>                    | <ul style="list-style-type: none"> <li>COP path length and COP travel speed significantly improved in EG, but not in CG</li> <li>Thickness of abdominal muscles on affected side changed for EG</li> </ul>                                                                                                                                                  |
| (Baillet <i>et al.</i> , 2019)<br>France  | N = 18<br>51.1±13.0 years (EG)<br><br>39.9±18.6 years (CG)<br><br>>1 year post stroke | N = 10<br>Horse riding therapy<br><br>2 times/ week for 12 weeks, 30 min/session                                            | N = 8<br>Conventional therapy<br><br>2 times/ week for 12 weeks, 30 min/session                                                  | Simulator | Physical                                 | <ul style="list-style-type: none"> <li>Postural coordination (OptiTrack system, DRP)</li> </ul>                                                                                   | <ul style="list-style-type: none"> <li>Significant change of trunk/horse coordination with low frequencies for EG</li> <li>Significant change of head/horse coordination with lowest frequency for EG</li> </ul>                                                                                                                                            |
| (Beinotti <i>et al.</i> , 2010)<br>Brazil | N = 20<br><br>59 years (EG) and 52 years (CG)<br><br>>1 year post stroke              | N = 10<br>Conventional therapy + EAT<br><br>2 times/ week plus 1 time/ week for                                             | N = 10<br>Conventional therapy alone<br><br>3 times/ week for 16 weeks, session length unknown                                   | Horse     | Physical<br><br>Physical<br><br>Physical | <ul style="list-style-type: none"> <li>Lower extremity motor impairment (FMLE)</li> <li>Balance (Berg Balance Scale + Balance items FMLE)</li> <li>Gait (FAC, cadence)</li> </ul> | <ul style="list-style-type: none"> <li>Significant improvement of FMLE in EG and significant difference between EG and CG</li> <li>Significant time effect in BBS for all subjects, with greater improvement for EG (although not statistically significant)</li> <li>No significant change for FMLE balance part, FAC, cadence or average speed</li> </ul> |

| Study and Location                                | Patient population                                                                                     | Intervention                                                                                                |                                                                                       | Horse | Outcome domain                                    | Outcome measures                                                                                                                                                                                                                                                                             | Key findings                                                                                                                                                                                                                                                                                                                                                     |
|---------------------------------------------------|--------------------------------------------------------------------------------------------------------|-------------------------------------------------------------------------------------------------------------|---------------------------------------------------------------------------------------|-------|---------------------------------------------------|----------------------------------------------------------------------------------------------------------------------------------------------------------------------------------------------------------------------------------------------------------------------------------------------|------------------------------------------------------------------------------------------------------------------------------------------------------------------------------------------------------------------------------------------------------------------------------------------------------------------------------------------------------------------|
|                                                   |                                                                                                        | 16 weeks, session length unknown                                                                            |                                                                                       |       |                                                   |                                                                                                                                                                                                                                                                                              |                                                                                                                                                                                                                                                                                                                                                                  |
| (Beinotti <i>et al.</i> , 2013)<br>Brazil         | N = 24<br><br>59 years (EG) and 52 years (CG)<br><br>>1 year post stroke                               | N = 12<br>Conventional therapy + EAT<br><br>3 times/week for 16 weeks, 50 min/session plus 30 min EAT/ week | N = 12<br>Conventional therapy alone<br><br>3 times/week for 16 weeks, 50 min/session | Horse | Psychological                                     | <ul style="list-style-type: none"> <li>QoL (SF-36)</li> </ul>                                                                                                                                                                                                                                | <ul style="list-style-type: none"> <li>Significant improvement of QoL of EG compared to CG</li> <li>Specifically: improvements in functional capacity, physical aspects, mental health</li> </ul>                                                                                                                                                                |
| (Bunketorp-Käll <i>et al.</i> , 2017b)*<br>Sweden | N = 123<br><br>62.6±6.5 years (EG) and 63.7±6.7 years (CG)<br><br>≥10 months and ≤5 years after stroke | N = 41<br>Horse-riding + interaction with horse<br><br>2 times/week for 12 weeks, 240 min/session<br><br>** | N = 41<br>Continuation of standard therapy without starting any new therapy           | Horse | Psychological                                     | <ul style="list-style-type: none"> <li>Perception of stroke recovery (SIS-9)</li> </ul>                                                                                                                                                                                                      | <ul style="list-style-type: none"> <li>Change in SIS-9 significantly higher than CG which was sustained for both 3- and 6-months post intervention</li> <li>TUGT, BBS, and BDL-BS significantly improved after EAT and were significantly larger than for CG</li> <li>No significant changes for hand strength or cognition/ working memory after EAT</li> </ul> |
| (Bunketorp-Käll <i>et al.</i> , 2019)*<br>Sweden  |                                                                                                        |                                                                                                             |                                                                                       |       | Physical<br>Physical<br>Physical<br>Psychological | <ul style="list-style-type: none"> <li>Gait (TUGT)</li> <li>Balance (BBS, BDL-BS)</li> <li>Hand strength (Gripping)</li> <li>General cognitive level (Barrow Neurological Institute screen for higher cerebral functions)</li> <li>Working memory (Letter-number sequencing test)</li> </ul> |                                                                                                                                                                                                                                                                                                                                                                  |
| (Bunketorp-Käll <i>et al.</i> , 2020)*<br>Sweden  |                                                                                                        |                                                                                                             |                                                                                       |       | Psychological                                     | <ul style="list-style-type: none"> <li>Correlation between perceived recovery of stroke (SIS-9) and M-MAS UAS, BBS, TUGT, 10 mWT</li> </ul>                                                                                                                                                  |                                                                                                                                                                                                                                                                                                                                                                  |

| Study and Location                  | Patient population                                                                                                   | Intervention                                                                                                                                                                         |                                                                                             | Horse     | Outcome domain       | Outcome measures                                                                                    | Key findings                                                                                                                                                                                                                                                             |
|-------------------------------------|----------------------------------------------------------------------------------------------------------------------|--------------------------------------------------------------------------------------------------------------------------------------------------------------------------------------|---------------------------------------------------------------------------------------------|-----------|----------------------|-----------------------------------------------------------------------------------------------------|--------------------------------------------------------------------------------------------------------------------------------------------------------------------------------------------------------------------------------------------------------------------------|
|                                     |                                                                                                                      |                                                                                                                                                                                      |                                                                                             |           |                      |                                                                                                     | <ul style="list-style-type: none"> <li>After intervention, change in self-selected and fast 10 mWT significantly correlated (negatively) with change in SIS-9</li> <li>Conclusion: Individual perception of recovery was associated with improvements in gait</li> </ul> |
| (Cho and Cho, 2015)<br>Korea        | N = 30<br><br>54.20±9.21 (EG) and 54.00±8.79 (CG)<br><br>≥6 months post stroke                                       | N = 15<br>Therapeutic exercise + horse riding<br><br>7 times/ week for 6 weeks, 30 min<br>Plus<br>3 times/week for 6 weeks, 20 min/session horse-riding training                     | N = 15<br>Therapeutic exercise<br><br>7 times/ week for 6 weeks, 30 min                     | Simulator | Physical             | <ul style="list-style-type: none"> <li>Balance (BioRescue system)</li> </ul>                        | <ul style="list-style-type: none"> <li>EC moving distance of COP increased significantly after intervention for EG</li> <li>No significant differences between groups</li> </ul>                                                                                         |
| (Han <i>et al.</i> , 2012)<br>Korea | N = 37<br><br>61.1±6.3 (EG) and 62.2±6.9 (CG)<br><br>Early chronic stroke patients, on average 12 months post stroke | N = 19<br>Conventional physiotherapy (NDT) + horse-riding therapy<br><br>2 times/week for 12 weeks, 30 min/session<br>Plus<br>2 times/week for 12 weeks, 20 min/session horse-riding | N = 18<br>Conventional physiotherapy (NDT)<br><br>2 times/week for 12 weeks, 30 min/session | Simulator | Physical<br>Physical | <ul style="list-style-type: none"> <li>Gait (FAC, G-POMA)</li> <li>Balance (BBS, B-POMA)</li> </ul> | <ul style="list-style-type: none"> <li>No difference for gait</li> <li>Balance parameters (BBS, B-POMA) improved significantly after training for EG</li> <li>Between groups: significant difference post treatment in dynamic balance category of BBS</li> </ul>        |

| Study and Location                   | Patient population                                                                                               | Intervention                                                                        |                                                                             | Horse     | Outcome domain                        | Outcome measures                                                                                                                    | Key findings                                                                                                                                                                                                                                                                                                                                                                                                                                                             |
|--------------------------------------|------------------------------------------------------------------------------------------------------------------|-------------------------------------------------------------------------------------|-----------------------------------------------------------------------------|-----------|---------------------------------------|-------------------------------------------------------------------------------------------------------------------------------------|--------------------------------------------------------------------------------------------------------------------------------------------------------------------------------------------------------------------------------------------------------------------------------------------------------------------------------------------------------------------------------------------------------------------------------------------------------------------------|
| (Kim <i>et al.</i> , 2014b)<br>Korea | N = 20<br><br>63.9 ± 8.7 years<br><br>≥6 months post stroke, on average 2 years post stroke                      | N = 20<br><br>Horse riding training<br><br>5 times/week for 6 weeks, 30 min/session | No CG                                                                       | Simulator | Physical<br><br>Physical              | <ul style="list-style-type: none"> <li>Gait (FGA, GAITRite Gait analyzer)</li> <li>Trunk balance (TIS, BioRescue system)</li> </ul> | <ul style="list-style-type: none"> <li>Gait: Significant improvements were found after the training for all parameters (FGA; GAITRite: gait velocity, cadence, stride length of the affected and unaffected sides, and double limb support of the affected and unaffected sides)</li> <li>Balance: Significant improvements were found after the training for all parameters (TIS; BioRescue: sway area, sway length, sway speed for EO and EC, respectively)</li> </ul> |
| (Kim and Lee, 2015)<br>Korea         | N = 20<br><br>71.1 ± 3.0 (EG) and 69.2 ± 3.4 (CG)<br><br>≥6 months post stroke, on average 11 months post stroke | N = 10<br>Horse riding training<br><br>5 days/week for 6 weeks, 30 min/session      | N = 10<br>NDT<br><br>5 days/week for 6 weeks, 30 min/session                | Simulator | Physical<br>Physical<br>Physical      | <ul style="list-style-type: none"> <li>Gait (10 mWT)</li> <li>Balance (BBS)</li> <li>ADL (MBI)</li> </ul>                           | <ul style="list-style-type: none"> <li>All outcome measures (10 MWT, BBS, MBI) increased significantly for EG, but not for CG</li> <li>Between groups: after intervention, all outcome measures were significantly better in experimental group</li> </ul>                                                                                                                                                                                                               |
| (Lee <i>et al.</i> , 2014a)<br>Korea | N = 30<br>63.8±6.2 (EG) and 64.3±4.8 (CG)<br><br>Not specified                                                   | N = 15<br>Horse riding training<br><br>3 days/week for 8 weeks, 30 min/session      | N = 15<br>Treadmill Training<br><br>3 days/week for 8 weeks, 30 min/session | Horse     | Physical<br>Physical                  | <ul style="list-style-type: none"> <li>Balance (BBS)</li> <li>Gait (Gait Analyzer)</li> </ul>                                       | <ul style="list-style-type: none"> <li>Significant improvements in BBS, gait velocity and step length asymmetry for EG</li> <li>Significant improvements for step length asymmetry for CG</li> <li>Between groups: significant difference in gait velocity and step length asymmetry</li> </ul>                                                                                                                                                                          |
| (Lee and Kim, 2015)<br>Korea         | N = 30<br><br>68.4±2.1 (EG) and 67.0±3.2 (CG)                                                                    | N = 15<br>Conventional therapy + horse-riding                                       | N = 15<br>Conventional therapy                                              | Simulator | Physical<br>Physical<br>Psychological | <ul style="list-style-type: none"> <li>Gait (TUGT)</li> <li>Balance (BBS)</li> <li>Depression (BDI)</li> </ul>                      | <ul style="list-style-type: none"> <li>All outcomes (TUGT, BBS, BDI) improved significantly after the training for the EG, but not CG</li> <li>The pre-post differences for each outcome were calculated and compared per group:</li> </ul>                                                                                                                                                                                                                              |

| Study and Location                    | Patient population                                                                                                                                 | Intervention                                                                                                                                                          |                                                                                                                                                                       | Horse     | Outcome domain            | Outcome measures                                                                                       | Key findings                                                                                                                                                                                                                                                                                                                                                                                                                   |
|---------------------------------------|----------------------------------------------------------------------------------------------------------------------------------------------------|-----------------------------------------------------------------------------------------------------------------------------------------------------------------------|-----------------------------------------------------------------------------------------------------------------------------------------------------------------------|-----------|---------------------------|--------------------------------------------------------------------------------------------------------|--------------------------------------------------------------------------------------------------------------------------------------------------------------------------------------------------------------------------------------------------------------------------------------------------------------------------------------------------------------------------------------------------------------------------------|
|                                       | Early chronic stage, on average 12 months post stroke                                                                                              | 5 days/week for 6 weeks, 30 min/session<br>Plus<br>5 times/ week for 6 weeks, 30 min/session horse-riding                                                             | 5 days/week for 6 weeks, 30 min/session                                                                                                                               |           |                           |                                                                                                        | for all three outcomes, the EG showed significantly larger improvements                                                                                                                                                                                                                                                                                                                                                        |
| (Park <i>et al.</i> , 2013)<br>Korea  | N = 67<br><br>56.09±7.22 years (EG) and<br>51.55±8.27 years (CG)<br><br>≥7 months post stroke                                                      | N = 34<br>Physical therapy + horse riding<br><br>6 times/ week for 8 weeks, session duration unknown<br>Plus<br>3 times/week for 8 weeks, 35 min/session horse riding | N = 33<br>Physical therapy + mat exercise<br><br>6 times/ week for 8 weeks, session duration unknown<br>Plus<br>3 times/week for 8 weeks, 35 min/session mat exercise | Simulator | Physical                  | <ul style="list-style-type: none"> <li>Balance (KAT balance system, BBS)</li> </ul>                    | <ul style="list-style-type: none"> <li>Significant increase of EOB and ECB and significant increase of BBS after intervention for both groups</li> <li>Increase of ECB and BBS significantly higher in EG compared to CG</li> </ul>                                                                                                                                                                                            |
| (Pohl <i>et al.</i> , 2018)<br>Sweden | N = 18<br>(selected from larger sample in (Bunketorp-Käll <i>et al.</i> , 2017b)<br><br>Mean age: 62 years<br>≥10 months and ≤5 years after stroke | See (Bunketorp-Käll <i>et al.</i> , 2017b)                                                                                                                            |                                                                                                                                                                       |           | Psychological             | <ul style="list-style-type: none"> <li>Semi-structured interview</li> </ul>                            | <ul style="list-style-type: none"> <li>Patients were positively affected by intervention in different domains</li> <li>Four broad themes were identified: transformative experience; human–horse interaction; togetherness and belonging; and the all-in-one solution</li> <li>Conclusion: EAT may provide an enriched and pleasurable intervention having an impact on physical, psychological, and social aspects</li> </ul> |
| (Sung <i>et al.</i> , 2013)<br>Korea  | N = 20                                                                                                                                             | N = 10                                                                                                                                                                | N = 10                                                                                                                                                                | Simulator | Physical<br>Physiological | <ul style="list-style-type: none"> <li>Gait (OptoGait)</li> <li>Trunk muscle activity (EMG)</li> </ul> | <ul style="list-style-type: none"> <li>Significantly improved gait parameters, such as: single support, load response,</li> </ul>                                                                                                                                                                                                                                                                                              |

| Study and Location                     | Patient population                                                                                                  | Intervention                                                                                                                           |                                                                      | Horse | Outcome domain                                    | Outcome measures                                                                                                                                    | Key findings                                                                                                                                                                                                                                                                                                                                                                                                                                                                                                                                             |
|----------------------------------------|---------------------------------------------------------------------------------------------------------------------|----------------------------------------------------------------------------------------------------------------------------------------|----------------------------------------------------------------------|-------|---------------------------------------------------|-----------------------------------------------------------------------------------------------------------------------------------------------------|----------------------------------------------------------------------------------------------------------------------------------------------------------------------------------------------------------------------------------------------------------------------------------------------------------------------------------------------------------------------------------------------------------------------------------------------------------------------------------------------------------------------------------------------------------|
|                                        | 48.2±8.2 (EG) and 54.2±10.4 (CG)<br><br>Minimum time since stroke not mentioned, on average 1-1.5 years post stroke | Therapeutic exercise + horse-riding<br><br>5 times/week for 4 weeks, 45 min/session<br>Plus<br>5 times/week for 4 weeks, 15min/session | Therapeutic exercise<br><br>5 times/week for 4 weeks, 60 min/session |       |                                                   |                                                                                                                                                     | total double support, and pre-swing for EG compared to CG <ul style="list-style-type: none"> <li>EG showed significant increase of paretic erector spinae activation during sit to stand after intervention (by 21.6%) which was also significantly different from CG</li> <li>No significant change in paretic rectus abdominis activation during sit to stand over time, but significant difference between groups</li> <li>Activation of erector spinae and rectus abdominis in gait correlate with changes of significant gait parameters</li> </ul> |
| (Sunwoo <i>et al.</i> , 2012)<br>Korea | N = 8<br><br>42.4±16.6 years<br><br>≥6 months post stroke                                                           | N = 8<br><br>Horse riding<br><br>2 times/week for 8 weeks, 30 min/session                                                              | No CG                                                                | Horse | Physical<br>Physical<br>Physical<br>Psychological | <ul style="list-style-type: none"> <li>Gait (10 mWT, FAC)</li> <li>Balance (BBS, POMA)</li> <li>ADL (MBI)</li> <li>Depression (BDI, HAM)</li> </ul> | <ul style="list-style-type: none"> <li>Outcomes were stable over two baseline assessments</li> <li>Significant increase in BBS and POMA after EAT</li> <li>Significant improvement in gait speed (10 mWT) after EAT</li> <li>No significant change in other outcomes</li> </ul>                                                                                                                                                                                                                                                                          |

*\*Findings from data of same study. \*\*This study included a second experimental condition including rhythm- and music-based therapies which is not further described here.*

*Abbreviations: ADL = Activities of daily living, BBS = Berg Balance Scale, BDL-BS = Bäckstrand, Dahlberg and Liljenäs Balance Scale, BDI = Becks Depression Inventory, B-POMA = Balance Part of Performance Oriented Mobility Assessment, CG = control group, CNSD = Central Nervous System Developmental, COP = Center of Pressure, DRP = Discrete relative phases, EAT = Equine-Assisted Therapy, EC = eyes closed, EG = experimental group, EMG = Electromyography, EO = eyes open, FAC = Functional Ambulation Category Scale, FGA = Functional Gait Assessment, FMLE = Fugl-Meyer Lower Extremity Scale, G-POMA = Gait part of Performance Oriented Mobility Assessment, HAM = Hamilton Depression Rating Scale, KAT = Kinesthetic Ability Trainer, MBI = Modified Barthel Index, M-MAS = Modified Motor Assessment Scale according to Uppsala University Hospital, POMA = Performance-Oriented Mobility Assessment, QoL = Quality of Life, SF-36 = Medical Outcomes Study 36-item Short-Form health survey, TIS = Trunk Impairment Scale, TUGT = Timed Up and Go Test, 10 mWT = Timed 10-meter walk test, 6 MWT = The six-minute walk test*

## **Subject characteristics**

In total, data from 437 patients (mean age range: 40 – 70 years) were included in this systematic review. Sample sizes ranged from 8 to 123 patients. With the exception of two studies (Baek and Kim, 2014, Lee *et al.*, 2014a), the stroke stage was specified. In one study, the minimum time since stroke was not reported, but the patients had suffered a stroke on average about one year earlier. (Sung *et al.*, 2013) All other studies included patients at the chronic stage of stroke (i.e., > 6 months post stroke). In two studies (Sunwoo *et al.*, 2012; Baillet *et al.*, 2019), the majority of patients were stroke patients, although, a small number of traumatic brain injury and cerebral palsy patients were also included. All other studies involved stroke patients only.

## **Study characteristics**

Of the 17 papers considered, data from only 14 studies is reported since four papers reported data from the same study. The included studies were conducted in Brazil (Beinotti *et al.*, 2010, 2013), France (Baillet *et al.*, 2019), Korea (Han *et al.*, 2012; Sunwoo *et al.*, 2012; Park *et al.*, 2013; Sung *et al.*, 2013, Kim *et al.*, 2014a, Lee *et al.*, 2014a; Cho and Cho, 2015; Kim and Lee, 2015; Lee and Kim, 2015), and Sweden (Bunketorp-Käll *et al.*, 2017b; Pohl *et al.*, 2018; Bunketorp-Käll *et al.*, 2019, 2020).

Study design and methodological quality, assessed by MMAT, are displayed in Tab. 2. Data from eight RCT, six NRT and one qualitative study were included in this systematic review. The overall study quality varied between the studies. While some studies fulfilled all criteria, others were lacking in major methodological details, suggesting that they had not been met.



**Tab. 2. Overview of study quality.** Study quality was assessed by MMAT. Depending on the method of the study, quality was assessed using different questions.

| Study                                            | MMAT assessment |    |             |     |     |     |     |                  |     |     |     |     |                  |     |     |     |     |
|--------------------------------------------------|-----------------|----|-------------|-----|-----|-----|-----|------------------|-----|-----|-----|-----|------------------|-----|-----|-----|-----|
|                                                  | Screening       |    | Qualitative |     |     |     |     | Quantitative RCT |     |     |     |     | Quantitative NRT |     |     |     |     |
|                                                  | S1              | S2 | 1.1         | 1.2 | 1.3 | 1.4 | 1.5 | 2.1              | 2.2 | 2.3 | 2.4 | 2.5 | 3.1              | 3.2 | 3.3 | 3.4 | 3.5 |
| (Baek and Kim, 2014)                             | Y               | Y  |             |     |     |     |     | U                | Y   | Y   | N   | U   |                  |     |     |     |     |
| (Baillet <i>et al.</i> , 2019)                   | Y               | Y  |             |     |     |     |     | Y                | Y   | Y   | N   | U   |                  |     |     |     |     |
| (Beinotti <i>et al.</i> , 2010)                  | Y               | Y  |             |     |     |     |     |                  |     |     |     |     | Y                | Y   | U   | Y   | U   |
| (Beinotti <i>et al.</i> , 2013)                  | Y               | Y  |             |     |     |     |     | Y                | Y   | Y   | Y   | Y   |                  |     |     |     |     |
| (Bunketorp-Käll <i>et al.</i> , 2017 <i>b</i> )* | Y               | Y  |             |     |     |     |     | Y                | Y   | Y   | Y   | U   |                  |     |     |     |     |
| (Bunketorp-Käll <i>et al.</i> , 2019)*           | Y               | Y  |             |     |     |     |     |                  |     |     |     |     |                  |     |     |     |     |
| (Bunketorp-Käll <i>et al.</i> , 2020)*           | Y               | Y  |             |     |     |     |     |                  |     |     |     |     |                  |     |     |     |     |
| (Cho and Cho, 2015)                              | Y               | Y  |             |     |     |     |     | U                | Y   | Y   | U   | U   |                  |     |     |     |     |
| (Han <i>et al.</i> , 2012)                       | Y               | Y  |             |     |     |     |     |                  |     |     |     |     | Y                | Y   | U   | N   | U   |
| (Kim <i>et al.</i> , 2014 <i>b</i> )             | Y               | Y  |             |     |     |     |     |                  |     |     |     |     | Y                | Y   | Y   | Y   | U   |
| (Kim and Lee, 2015)                              | Y               | Y  |             |     |     |     |     | U                | Y   | U   | U   | U   |                  |     |     |     |     |

| Study                         | MMAT assessment |    |             |     |     |     |     |                  |     |     |     |     |                  |     |     |     |     |
|-------------------------------|-----------------|----|-------------|-----|-----|-----|-----|------------------|-----|-----|-----|-----|------------------|-----|-----|-----|-----|
|                               | Screening       |    | Qualitative |     |     |     |     | Quantitative RCT |     |     |     |     | Quantitative NRT |     |     |     |     |
|                               | S1              | S2 | 1.1         | 1.2 | 1.3 | 1.4 | 1.5 | 2.1              | 2.2 | 2.3 | 2.4 | 2.5 | 3.1              | 3.2 | 3.3 | 3.4 | 3.5 |
| (Lee <i>et al.</i> , 2014a)   | Y               | Y  |             |     |     |     |     | U                | Y   | U   | U   | U   |                  |     |     |     |     |
| (Lee and Kim, 2015)           | Y               | Y  |             |     |     |     |     |                  |     |     |     |     | Y                | N   | U   | N   | U   |
| (Park <i>et al.</i> , 2013)   | Y               | Y  |             |     |     |     |     |                  |     |     |     |     | Y                | Y   | U   | Y   | U   |
| (Pohl <i>et al.</i> , 2018)   | Y               | Y  | Y           | Y   | Y   | Y   | Y   |                  |     |     |     |     |                  |     |     |     |     |
| (Sung <i>et al.</i> , 2013)   | Y               | Y  |             |     |     |     |     | U                | Y   | U   | U   | U   |                  |     |     |     |     |
| (Sunwoo <i>et al.</i> , 2012) | Y               | Y  |             |     |     |     |     |                  |     |     |     |     | Y                | Y   | Y   | Y   | Y   |

Questions: S1: Are there clear research questions?, S2: Do the collected data allow to address the research questions?, 1.1: Is the qualitative approach appropriate to answer the research question?, 1.2: Are the qualitative data collection methods adequate to address the research question?, 1.3: Are the findings adequately derived from the data?, 1.4: Is the interpretation of results sufficiently substantiated by data?, 1.5: Is there coherence between qualitative data sources, collection, analysis and interpretation?, 2.1: Is randomization appropriately performed?, 2.2: Are the groups comparable at baseline?, 2.3: Are there complete outcome data? [at least 80% of data], 2.4: Are outcome assessors blinded to the intervention provided?, 2.5: Did the participants adhere to the assigned intervention?, 3.1: Are the participants representative of the target population?, 3.2: Are measurements appropriate regarding both the outcome and intervention (or exposure)?, 3.3: Are there complete outcome data?, 3.4: Are the confounders accounted for in the design and analysis?, 3.5: During the study period, is the intervention administered (or exposure occurred) as intended? (Hong *et al.*, 2018)

Abbreviations: MMAT = Mixed Methods Appraisal Tool, N = criterion not met, NRT = Non-randomized Trial, RCT = Randomized Controlled Trial, U = unclear if criterion was met, Y = criterion met

\*Findings from data of same study.

## Intervention

Different forms of intervention and terminology were used. Four studies referred to their intervention as *hippotherapy* (Beinotti *et al.*, 2010; Sunwoo *et al.*, 2012, Lee *et al.*, 2014b) or *hippotherapy simulator* (Sung *et al.*, 2013); four studies used *horse-riding therapy* (Bunketorp-Käll *et al.*, 2017b, 2019, 2020) or *horse-riding exercise* (Kim and Lee, 2015); two studies used *horseback riding* (Pohl *et al.*, 2018) or *horseback riding therapy* (Beinotti *et al.*, 2013); two studies used *horse riding simulation training* (Baek and Kim, 2014, Kim *et al.*, 2014a); one study used *horseback riding simulator exercise* (Park *et al.*, 2013), a further study used *mechanical horse practice* (Baillet *et al.*, 2019); and three studies referred to their intervention as *mechanical horseback riding* (Han *et al.*, 2012; Cho and Cho, 2015; Lee and Kim, 2015). The exact protocol was not, or only briefly described in most studies. In general, some studies included exercises during riding while other studies did not.

A short summary of the parameters of EG and CG applied in each study can be found in Tab. 1. While eight studies applied EAT in addition to conventional therapy (Beinotti *et al.*, 2010; Han *et al.*, 2012; Beinotti *et al.*, 2013; Park *et al.*, 2013; Sung *et al.*, 2013; Baek and Kim, 2014; Cho and Cho, 2015; Lee and Kim, 2015), the others applied EAT only. (Sunwoo *et al.*, 2012, Kim *et al.*, 2014a, Lee *et al.*, 2014a; Kim and Lee, 2015, Bunketorp-Käll *et al.*, 2017b; Pohl *et al.*, 2018; Baillet *et al.*, 2019; Bunketorp-Käll *et al.*, 2019, 2020) Total time of EAT varied between 300 and 5760min ( $1043 \pm 1377$ min,  $M \pm SD$ ). EAT was applied within four to 16 weeks, in 16 to 30 total sessions.

With the exception of two studies (Sunwoo *et al.*, 2012, Kim *et al.*, 2014a), all included a control group (CG) which consisted of treadmill training (Lee *et al.*, 2014a) or another form of conventional therapy in the other studies. While most of the studies had comparable doses for the experimental group (EG) and CG, in four studies, both

groups performed the same training and the EG did EAT in addition; thus resulting in different training doses. (Han *et al.*, 2012; Beinotti *et al.*, 2013; Cho and Cho, 2015; Lee and Kim, 2015)

In eight reports that referred to five studies, the intervention was applied with horses (Beinotti *et al.*, 2010; Sunwoo *et al.*, 2012; Beinotti *et al.*, 2013, Lee *et al.*, 2014a, Bunketorp-Käll *et al.*, 2017b; Pohl *et al.*, 2018; Bunketorp-Käll *et al.*, 2019, 2020), whereas the other studies used riding simulators.

## **Outcome measures**

### *Physical measures*

Fourteen studies evaluated the effects of EAT on physical outcome measures. (Beinotti *et al.*, 2010; Han *et al.*, 2012; Sunwoo *et al.*, 2012; Park *et al.*, 2013; Sung *et al.*, 2013; Baek and Kim, 2014, Kim *et al.*, 2014a, Lee *et al.*, 2014a; Cho and Cho, 2015; Kim and Lee, 2015; Lee and Kim, 2015, Bunketorp-Käll *et al.*, 2017a; Baillet *et al.*, 2019; Bunketorp-Käll *et al.*, 2019) The domains evaluated included balance, gait, postural coordination, activities of daily living (ADL), lower extremity motor impairment, motor function and hand strength.

Balance was measured in eleven reports. (Beinotti *et al.*, 2010; Han *et al.*, 2012; Sunwoo *et al.*, 2012; Park *et al.*, 2013; Baek and Kim, 2014, Kim *et al.*, 2014a, Lee *et al.*, 2014a; Cho and Cho, 2015; Kim and Lee, 2015; Lee and Kim, 2015, Bunketorp-Käll *et al.*, 2017b) It was assessed by the Berg Balance Scale (BBS), Balance Part of the Performance Oriented Mobility Assessment (B-POMA, POMA), Balance systems, Balance Items of the Fugl-Meyer Lower Extremity Scale (FMLE), and Bäckstrand, Dahlberg and Liljenäs Balance Scale (BDL-BS) and the Trunk Impairment Scale (TIS).

Gait was assessed in ten reports. (Beinotti *et al.*, 2010; Han *et al.*, 2012; Sunwoo *et al.*, 2012; Sung *et al.*, 2013, Kim *et al.*, 2014a, Lee *et al.*, 2014a; Kim and Lee, 2015; Lee and Kim, 2015, Bunketorp-Käll *et al.*, 2017b, 2019) It was investigated by the Functional Ambulation Category Scale (FAC), Functional Gait Assessments (FGA; part cadence), Timed Up and Go Test (TUGT), Timed 10-meter walk test (10 mWT), the six-minute walk test (6 MWT), Gait part of Performance Oriented Mobility Assessment (G-POMA), and Gait analyzer.

In one study, an optical tracking system was used to assess postural coordination. (Baillet *et al.*, 2019)

ADL were investigated in two studies using the Modified Barthel Index (MBI). (Sunwoo *et al.*, 2012; Kim and Lee, 2015)

In one study, lower extremity motor impairment was investigated by the FMLE. (Beinotti *et al.*, 2010) In another report, general motor function was investigated using the Modified Motor Assessment Scale according to Uppsala University Hospital (M-MAS UAS). (Bunketorp-Käll *et al.*, 2019) Finally, a further study used a dynamometer (Gripit) to assess hand strength. (Bunketorp-Käll *et al.*, 2017b)

### *Psychological measures*

The effects on psychological outcome measures were investigated in six studies. (Sunwoo *et al.*, 2012; Beinotti *et al.*, 2013; Lee and Kim, 2015, Bunketorp-Käll *et al.*, 2017b; Pohl *et al.*, 2018; Bunketorp-Käll *et al.*, 2020) The domains included depression, perception of the intervention and of recovery from stroke, cognition, as well as quality of life (QoL).

Depression was assessed in two studies by Becks Depression Inventory (BDI) and/or Hamilton Depression Rating Scale (HAM). (Sunwoo *et al.*, 2012; Lee and Kim, 2015)

Two other studies assessed different domains of the patients' perception of EAT. Specifically, one study performed a qualitative assessment using semi-structured interviews. (Pohl *et al.*, 2018) The other study assessed the correlation between changes in different outcomes and the change in perceived recovery from stroke. (Bunketorp-Käll *et al.*, 2020) One study investigated the change in perceived recovery from stroke (Stroke Impact Scale, Item 9; SIS-9) after EAT. In the same study, both the general cognitive level and the working memory were further examined using the Barrow Neurological Institute screen for higher cerebral functions and the Letter-number sequencing test, respectively. (Bunketorp-Käll *et al.*, 2017b) QoL was investigated in one study by the Medical Outcomes Study 36-item Short-Form health survey (SF-16). (Beinotti *et al.*, 2013)

#### *Physiological measures*

Effects of EAT on physiological parameters were investigated in two studies. (Sung *et al.*, 2013; Baek and Kim, 2014) One study examined muscle thickness using ultrasonic imaging. (Baek and Kim, 2014) The other study investigated trunk muscle activity by electromyography (EMG). (Sung *et al.*, 2013)

### ***Effects of intervention on outcome measures***

#### *Effects of EAT on physical outcome*

The majority of the eleven studies investigating the effects of EAT on balance (Beinotti *et al.*, 2010; Han *et al.*, 2012; Sunwoo *et al.*, 2012; Park *et al.*, 2013; Baek and Kim, 2014, Kim *et al.*, 2014a, Lee *et al.*, 2014a; Cho and Cho, 2015; Kim and Lee, 2015; Lee and Kim, 2015, Bunketorp-Käll *et al.*, 2017b) reported positive effects. Specifically, all eight studies investigating the effect of EAT using the BBS reported improved scores. (Beinotti *et al.*, 2010; Han *et al.*, 2012; Sunwoo *et al.*, 2012; Park *et al.*, 2013,

Lee *et al.*, 2014a; Kim and Lee, 2015; Lee and Kim, 2015, Bunketorp-Käll *et al.*, 2017b)

Moreover, significant improvements in POMA (Sunwoo *et al.*, 2012), B-POMA (Han *et al.*, 2012), and TIS (Kim *et al.*, 2014a) were observed after EAT. With balance systems, positive effects on balance could be identified, specifically on Center of Pressure (COP) path length and COP travel speed (Baek and Kim, 2014); Eyes closed (EC) moving distance of COP (Cho and Cho, 2015); sway area, sway length, sway speed for Eyes open (EO) and EC, respectively (Kim *et al.*, 2014a); EO balance and EC balance (Park *et al.*, 2013). However, no effect was found for EO moving distance of COP (Cho and Cho, 2015). Furthermore, no effect was detected for balance part of FMLE (Beinotti *et al.*, 2010) and BDL-BS (Bunketorp-Käll *et al.*, 2017b).

For gait, positive effects of EAT were noted in the TUGT (Lee and Kim, 2015, Bunketorp-Käll *et al.*, 2017b) and the 10 mWT (Sunwoo *et al.*, 2012; Kim and Lee, 2015; Bunketorp-Käll *et al.*, 2019). Moreover, with gait analyzer, positive effects were found on single support, load response, total double support, and pre-swing (Sung *et al.*, 2013), gait velocity (Kim *et al.*, 2014a, Lee *et al.*, 2014a), and step length asymmetry (Lee *et al.*, 2014a), as well as on stride length of the affected and unaffected sides, and double limb support of the affected and unaffected sides (Kim *et al.*, 2014a). However, no effects of EAT on gait were detected in the 6 MWT (Bunketorp-Käll *et al.*, 2019), the FAC (Beinotti *et al.*, 2010; Han *et al.*, 2012; Sunwoo *et al.*, 2012), or on the G-POMA (Han *et al.*, 2012). In addition, with gait analyzer, no effects of EAT were found on step length, stance phase, or swing phase (Sung *et al.*, 2013). For cadence, one study found a positive effect (Kim *et al.*, 2014a) (assessed by gait analyzer), while others reported a negative effect (Beinotti *et al.*, 2010) (assessed by FGA) and (Sung *et al.*, 2013) (gait analyzer).

In addition, benefits of EAT on posture were found within a pilot study. (Baillet *et al.*, 2019)

Of the two studies investigating changes in ADL after EAT, one study detected a significant improvement in ADL (Kim and Lee, 2015), while the other study did not find an effect on ADL (Sunwoo *et al.*, 2012).

In one study, lower extremity motor impairment improved significantly in the EG, and these improvements were also significantly larger than for CG. (Beinotti *et al.*, 2010)

There was a significant improvement in overall motor function after EAT in one study. (Bunketorp-Käll *et al.*, 2019)

Although there was a significant time effect for hand strength for all groups in one study, there was no significant effect of hand strength after EAT compared to CG. (Bunketorp-Käll *et al.*, 2017b)

#### *Effects of EAT on psychological outcome*

Findings for depression varied between studies. One study reported significant improvements in the BDI after EAT (Lee and Kim, 2015), while the other did not show any significant changes for either the BDI or the HAM. (Sunwoo *et al.*, 2012)

Two studies investigated the perception of the intervention itself, which was reported to have positive effects on different domains. (Pohl *et al.*, 2018) To summarize, stroke patients perceived the intervention as a rich and pleasurable experience that had a positive impact on their emotional and physical domains. (Pohl *et al.*, 2018) Furthermore, changes in perceived recovery were associated with improved aspects of gait. (Bunketorp-Käll *et al.*, 2020)



Perceived recovery from stroke increased significantly after EAT and persisted for three- and six-months post intervention. This increase was furthermore significantly higher than for the CG. (Bunketorp-Käll *et al.*, 2017b)

Although there were slight increases in general cognition and the Letter Number Sequencing test in one study, no significant effect was observed for these parameters after EAT. (Bunketorp-Käll *et al.*, 2017b)

There was a positive effect on QoL after EAT, in particular for the domains of functional capacity, physical aspects and mental health. (Beinotti *et al.*, 2013)

### *Effects of EAT on physiological outcome*

Prior to EAT, the external oblique muscle on the affected side was significantly less thick than on the non-affected side, as measured by ultrasonic imaging. Following EAT, the thickness increased significantly, and was therefore more similar to the non-affected side. By contrast, muscle thickness of the internal oblique and transversus abdominis was comparable between affected and non-affected side and did not change after the intervention. (Baek and Kim, 2014)

In addition, by using EMG recordings, the trunk muscle activity during sit-to-stand was measured after EAT. Paretic erector spinae activation was significantly higher for the EG after the intervention which, moreover, differed significantly from the CG. By contrast, the rectus abdominis remained unchanged. (Sung *et al.*, 2013)

## Discussion

### *Summary of results*

Taken together, this systematic literature review revealed 17 studies that evaluated the effect of EAT on health-related outcomes. While fourteen studies reported physical outcomes, six studies reported psychological outcomes and two studies reported physiological parameters. In general, the positive effects of EAT on stroke recovery could be identified in all the domains investigated, i.e., physical (balance, gait, postural control, lower extremity motor impairment, and motor function), psychological (perceived recovery from stroke, and QoL), and physiological (abdominal muscle thickness, trunk muscle activation) parameters. The most consistent and robust beneficial effects were identified on balance and gait.

### *Physical effects of EAT*

Although different aspects of physical effects of EAT were studied, most of the studies focused on investigating the effects of EAT on balance and/or gait.

Independent of the exact intervention and dose, all eight studies investigating the effects of EAT on balance, as measured by BBS, reported positive effects of EAT. BBS is a valid tool for assessing balance during stroke recovery with an excellent reliability. (Blum and Korner-Bitensky, 2008) It measures both the static and dynamic aspects of balance, i.e., to maintain balance either statically or during functional tasks. (Blum and Korner-Bitensky, 2008) The 14 items include tasks such as standing on one or two legs with eyes open and closed, sitting or standing up or sitting down. (Berg *et al.*, 1989) This suggests a robust effect of EAT on general balance which has previously also been supported by a meta-analysis. (Dominguez-Romero *et al.*, 2020)

After stroke, gait issues are very common. Specifically, reduced walking speed and longer stance phase have been reported after stroke. (Olney and Richards, 1996; Beyaert *et al.*, 2015) After EAT, walking speed (measured by different assessment tools) was consistently found to increase. (Sunwoo *et al.*, 2012, Kim *et al.*, 2014a, Lee *et al.*, 2014c; Kim and Lee, 2015; Lee and Kim, 2015, Bunketorp-Käll *et al.*, 2017b, 2019) This indicates a robust finding across different studies. Recovery of gait parameters was reported as a major goal of stroke patients and is associated with quality of life. (Dobkin, 2005) In addition, recovery of gait and balance may decrease the risk of falling in stroke patients. (Beyaert *et al.*, 2015; Minet *et al.*, 2015)

One study furthermore found improved ADL (Kwon *et al.*, 2015), whereas another study applying a lower dose of EAT did not detect this (Sunwoo *et al.*, 2012). Thus, further consideration is required in this regard.

In addition, preliminary evidence was provided for improved lower extremity motor impairment (Beinotti *et al.*, 2010) and overall motor function after EAT (Bunketorp-Käll *et al.*, 2019). However, to our knowledge, the effects of EAT on fine motor control or spasticity in stroke patients have yet to be evaluated. While fine motor control was not formally assessed, stroke patients reported subjectively improved fine motor skills during a semi-structured interview. (Pohl *et al.*, 2018) Moreover, temporary (lower extremity) spasticity was shown to decrease for patients with cerebral palsy (Guindos-Sanchez *et al.*, 2020; Hyun *et al.*, 2022) or spinal cord injury (Lechner *et al.*, 2007; Rigby and Grandjean, 2016). Even though the effects on upper extremity spasticity remain unclear, EAT may hold a promising potential for decreasing spasticity after stroke. Future research should investigate both short- and long-term changes of upper and lower extremity spasticity, as well as changes in fine motor control. (Viruega *et al.*, 2022, 2023)

## **Psychological effects of EAT**

Different aspects of psychological effects after EAT were investigated in stroke patients. However, evidence was sparse, and findings varied between studies. For example, EAT was found to have positive effects on perceived recovery from stroke and QoL. (Beinotti *et al.*, 2013, Bunketorp-Käll *et al.*, 2017b) Furthermore, the intervention (applied in horses) had a large emotional impact on the participants. For example, they reported higher self-esteem and increased self-efficacy. (Pohl *et al.*, 2018) Moreover, perceived recovery from stroke was associated with improved gait parameters, emphasizing the high subjective importance of gait recovery for stroke patients. (Bunketorp-Käll *et al.*, 2020)

The evidence for effects of EAT on depression was, however, inconclusive (Sunwoo *et al.*, 2012; Lee and Kim, 2015) While depression was shown to improve in one study (Lee *et al.*, 2014c), it did not change on the other study (Sunwoo *et al.*, 2012). In this pilot study, however, the dose of EAT was much lower than in the other studies (i.e., 8h of EAT (Sunwoo *et al.*, 2012) vs. 15h EAT (Lee *et al.*, 2014c)) Additionally, only eight patients were enrolled in this study. The results might therefore be compromised by these constraints and require further consideration. In addition, no specific effects of EAT on cognitive aspects were observed. However, cognitive outcome was assessed in only one study, which reported cognitive improvements also for the other two conditions. (Bunketorp-Käll *et al.*, 2017b)

## **Physiological effects of EAT**

It is important to understand the underlying physiological mechanisms of EAT to explain physical and psychological findings, as well as to predict and optimize EAT protocols.

In this context, our systematic literature search identified only two studies for stroke patients, both which deal with muscle thickness and activity. (Sung *et al.*, 2013; Baek and Kim, 2014) While these studies may help to explain physical changes, e.g., in gait or balance, other factors may shape our understanding of the mechanisms of action and should be investigated in future studies. In healthy, elderly people, for example, EAT led to hormonal changes, i.e., to a significant increase in serotonin and a decrease in cortisol levels. (Cho *et al.*, 2015) In an autistic population, a decrease in the level of cortisol was detected in the course of EAT training. (Tabares *et al.*, 2012) In addition, an increase of progesterone levels over time was found. (Tabares *et al.*, 2012) Cortisol is a classical biomarker of stress and may thus reflect a lower level of stress after EAT. (García-Gómez *et al.*, 2020)

Moreover, preliminary investigations of brain physiology in this context have been made using EEG, fMRI, and NIRS. (Kim *et al.*, 2015; Hyun *et al.*, 2016; Cho, 2017; Lee *et al.*, 2017; Byzova *et al.*, 2020) In healthy elderly people, alpha power in the EEG increased during both riding a horse (Cho, 2017), and a riding simulator. (Kim *et al.*, 2015; Cho, 2017) Furthermore, one study used fMRI to assess changes in brain connectivity in children with ADHD. (Hyun *et al.*, 2016) Increased connectivity was detected both within the cerebellum (albeit not statistically higher than in the CG) (Lee *et al.*, 2015) and from the cerebellum to other regions, i.e., to the right insular cortex, right middle temporal gyrus, left superior temporal gyrus, and right precentral gyrus (Hyun *et al.*, 2016).

In addition, heart rate variability (HRV) in older adults increased after EAT when interacting with horses. (Baldwin *et al.*, 2018) Interestingly, the subjects' HRV often synchronized with the horses' HRV, suggesting social bonding. (Baldwin *et al.*, 2018, 2021)

Taken together, these findings suggest a positive effect of EAT on relaxation and increased concentration. (Cho, 2017; Baldwin *et al.*, 2018, 2021; García-Gómez *et al.*, 2020) However, it remains unclear as to which specific brain areas and networks are active and affected by EAT in stroke patients. Understanding the physiological mechanisms and clinical correlates of EAT may help to further optimize the therapy as well as to stratify patients who may benefit from it. (Cassidy and Cramer, 2017)

### ***Riding simulator vs. horse***

To assess the whole field, we included studies that applied EAT in both riding simulators and horses. However, this may impact the outcome. Although similar, riding simulators may not reflect movement comparable to that of a horse. (Park *et al.*, 2014) For example, some simulators apply only two-dimensional movements. (Park *et al.*, 2014; Baillet *et al.*, 2019) On the other hand, simulators offer the advantage of rhythmic movements without any deviation from the protocol compared to training with a real animal. (Baillet *et al.*, 2019) Riding simulators may also be more easily accessible and more affordable. (Park *et al.*, 2014) However, the emotional, and psychological effects of the interaction with a horse should not be underestimated. Meaningful and positively stimulating training may increase the likelihood of improvement. (Kleim and Jones, 2008; Pohl *et al.*, 2018; Ottiger *et al.*, 2021) For example, stroke patients who underwent EAT for several weeks stressed the importance and strong effect of bonding with the horse during therapy. (Pohl *et al.*, 2018) This was also confirmed by HRV studies which found a favorable effect of EAT on HRV. (Baldwin *et al.*, 2018, 2021; García-Gómez *et al.*, 2020) An ideal training plan might thus include an introduction to riding simulator to familiarize the patient with the movements and the training itself, whereas for the actual therapy, positive aspects of horses appear to outweigh the

advantages of riding simulators. (Park *et al.*, 2014; Funakoshi *et al.*, 2018; Baillet *et al.*, 2019)

## **Limitations**

In general, previous evidence of EAT in stroke patients is sparse and the study quality of the studies included was limited. In addition, variables, such as therapy dose or additional therapy, differed between studies, thereby limiting the comparability of studies. The question of dose-response relationship therefore also remains unsolved. (Rigby and Grandjean, 2016)

Furthermore, different terms were used to describe EAT, and different therapies were applied in the context of EAT. (Rigby and Grandjean, 2016) To assess the complete field in this review, we included all forms of EAT. For example, some interventions applied hippotherapy and others therapeutic horse riding. Importantly, terms were used inconsistently, and the applied interventions were often not described in detail. Therefore, it appears difficult to distinguish between the effects as different interventions may also vary in their effects. (Rigby and Grandjean, 2016)

## **Conclusion and future directions**

To conclude, EAT combines several important factors that may boost stroke rehabilitation of different symptoms. Specifically, this multimodal intervention consists of sensory, motor and cognitive components, is of high intensity, and incorporates emotional and motivational aspects. (Uchiyama *et al.*, 2011, Bunketorp-Käll *et al.*, 2017b)

While the benefits of EAT on recovery after stroke were identified in different domains, previous research is sparse and methodologically limited. Further research is therefore required to systematically evaluate the effects of EAT on physical function including

473 upper extremity motor function and spasticity, as well as on psychological factors. In  
474 addition, investigating physiological changes may help us to gain a better  
475 understanding of the underlying mechanisms and to further optimize future therapies.



## **Authorship contribution statement**

BHT: Conceptualization, Methodology, Investigation, Formal Analysis, Visualization, Writing – Original Draft, AG: Conceptualization, Project administration, Funding acquisition, Writing – Review and Editing

## **Declaration of competing interest**

The authors declare no conflict of interests.

## **Acknowledgments**

This work was supported by the German Federal Ministry of Education and Research [BMBF 13GW0570, BEVARES]. We acknowledge support from the Open Access Publishing Fund of the University of Tuebingen. We thank Karolina Talar for valuable methodological input.

## **Data availability**

The data that support the findings of this study are available for researchers from the first author upon reasonable request.

## References

- Achten D, Visser-Meily JMA, Post MWM, Schepers VPM. Life satisfaction of couples 3 years after stroke. *Disabil Rehabil* 2012; 34: 1468–72.
- Badin L, Alibran É, Pothier K, Bailly N. Effects of equine-assisted interventions on older adults' health: A systematic review. *Int J Nurs Sci* 2022; 9: 542–52.
- Baek IH, Kim BJ. The Effects of Horse Riding Simulation Training on Stroke Patients' Balance Ability and Abdominal Muscle Thickness Changes. *J Phys Ther Sci* 2014; 26: 1293–6.
- Baillet H, Leroy D, Verin E, Delpouve C, Benguigui N, Komar J, et al. Effect of Mechanical Horse Practice as New Postural Training in Patients With Neurological Disorders: A Pilot Study. *Front Psychol* 2019; 10: 1035.
- Baldwin AL, Rector BK, Alden AC. Effects of a Form of Equine-Facilitated Learning on Heart Rate Variability, Immune Function, and Self-Esteem in Older Adults. *People Anim Int J Res Pract* 2018; 1: 5.
- Baldwin AL, Rector BK, Alden AC. Physiological and Behavioral Benefits for People and Horses during Guided Interactions at an Assisted Living Residence. *Behav Sci (Basel)* 2021; 11
- Beinotti F, Christofolletti G, Correia N, Borges G. Effects of horseback riding therapy on quality of life in patients post stroke. *Top Stroke Rehabil* 2013; 20: 226–32.
- Beinotti F, Correia N, Christofolletti G, Borges G. Use of hippotherapy in gait training for hemiparetic post-stroke. *Arq Neuropsiquiatr* 2010; 68: 908–13.
- Berg K, Wood-Dauphinee S, Williams JI, Gayton D. Measuring balance in the elderly: Preliminary development of an instrument. *Physiother Canada* 1989; 41: 304–11.

516 Beyaert C, Vasa R, Frykberg GE. Gait post-stroke: Pathophysiology and  
517 rehabilitation strategies. *Neurophysiol Clin* 2015; 45: 335–55.

518 Blum L, Korner-Bitensky N. Usefulness of the Berg Balance Scale in stroke  
519 rehabilitation: A systematic review. *Phys Ther* 2008; 88: 559–66.

520 Brewer L, Horgan F, Hickey A, Williams D. Stroke rehabilitation: Recent advances  
521 and future therapies. *Qjm* 2013; 106: 11–25.

522 Bunketorp-Käll L, Lundgren-Nilsson Å, Nilsson M, Blomstrand C. Multimodal  
523 rehabilitation in the late phase after stroke enhances the life situation of informal  
524 caregivers. *Top Stroke Rehabil* 2017

525 Bunketorp-Käll L, Lundgren-Nilsson Å, Samuelsson H, Pekny T, Blomvé K, Pekna M,  
526 et al. Long-Term Improvements after Multimodal Rehabilitation in Late Phase after  
527 Stroke. *Stroke* 2017; 48: 1916–24.

528 Bunketorp-Käll L, Pekna M, Pekny M, Blomstrand C, Nilsson M. Effects of horse-  
529 riding therapy and rhythm and music-based therapy on functional mobility in late  
530 phase after stroke. *NeuroRehabilitation* 2019; 45: 483–92.

531 Bunketorp-Käll L, Pekna M, Pekny M, Samuelsson H, Blomstrand C, Nilsson M.  
532 Motor Function in the Late Phase After Stroke: Stroke Survivors' Perspective. *Ann*  
533 *Rehabil Med* 2020; 44: 362–9.

534 Byzova A, Roozbahani H, Handroos H, Hakansson N, Lankarani HM. Monitoring of  
535 the human body and brain behavior using optical motion capture system and EEG  
536 utilizing horseback riding simulator: an extended case study. *J Phys Ther Sci* 2020;  
537 32: 85–91.

538 Cassidy JM, Cramer SC. Spontaneous and Therapeutic-Induced Mechanisms of

539 Functional Recovery After Stroke. *Transl Stroke Res* 2017; 8: 33–46.

540 Cho SH. Effects of horseback riding exercise on the relative alpha power spectrum in  
541 the elderly. *Arch Gerontol Geriatr* 2017; 70: 141–7.

542 Cho SH, Kim JW, Kim SR, Cho BJ. Effects of horseback riding exercise therapy on  
543 hormone levels in elderly persons. *J Phys Ther Sci* 2015; 27: 2271–3.

544 Cho W-S, Cho S-H. Effects of Mechanical Horseback Riding Exercise on Static  
545 Balance of Patient with Chronic Stroke. *J Korea Acad Coop Soc* 2015; 16: 1981–8.

546 Collado-Mateo D, Lavín-Pérez AM, García JPF, García-Gordillo MÁ, Villafaina S.  
547 Effects of Equine-Assisted Therapies or Horse-Riding Simulators on Chronic Pain: A  
548 Systematic Review and Meta-Analysis. *Medicina (B Aires)* 2020; 56: 444.

549 Deutz U, Heussen N, Weigt-Usinger K, Leiz S, Raabe C, Polster T, et al. Impact of  
550 Hippotherapy on Gross Motor Function and Quality of Life in Children with Bilateral  
551 Cerebral Palsy: A Randomized Open-Label Crossover Study. *Neuropediatrics* 2018;  
552 49: 185–92.

553 Dobkin BH. Rehabilitation after stroke. *N Engl J Med* 2005 2005; 352: 1677–1684.

554 Dominguez-Romero JG, Molina-Aroca A, Moral-Munoz JA, Luque-Moreno C,  
555 Lucena-Anton D. Effectiveness of mechanical horse-riding simulators on postural  
556 balance in neurological rehabilitation: Systematic review and meta-analysis. *Int J*  
557 *Environ Res Public Health* 2020; 17

558 Feigin V, Krishnamurthi R, Parmar P, Norrving B, Mensah G, Bennett D, et al.  
559 Update on the Global Burden of Ischaemic and Haemorrhagic Stroke in 1990–2013:  
560 The GBD 2013 Study. *Neuroepidemiology* 2015; 45: 161–76.

561 Feigin VL, Brainin M, Norrving B, Martins S, Sacco RL, Hacke W, et al. World Stroke

562 Organization (WSO): Global Stroke Fact Sheet 2022. *Int J Stroke* 2022; 17: 18–29.

563 Funakoshi R, Masuda K, Uchiyama H, Ohta M. A possible mechanism of horseback  
564 riding on dynamic trunk alignment. *Heliyon* 2018; 4: e00777.

565 García-Gómez A, Guerrero-Barona E, García-Peña I, Rodríguez-Jiménez M,  
566 Moreno-Manso JM. Equine-assisted therapeutic activities and their influence on the  
567 heart rate variability: A systematic review. *Complement Ther Clin Pract* 2020; 39:  
568 101167.

569 Garner BA, Rigby BR. Human pelvis motions when walking and when riding a  
570 therapeutic horse. *Hum Mov Sci* 2015; 39: 121–37.

571 Grefkes C, Ward NS. Cortical reorganization after stroke: How much and how  
572 functional? *Neuroscientist* 2014; 20: 56–70.

573 Guindos-Sanchez L De, Lucena-Anton D, Moral-Munoz JA, Salazar A, Carmona-  
574 Barrientos I. The effectiveness of hippotherapy to recover gross motor function in  
575 children with cerebral palsy: A systematic review and meta-analysis. *Children* 2020;  
576 7: 106.

577 Han JY, Kim JM, Kim SK, Chung JS, Lee H-CC, Lim JK, et al. Therapeutic effects of  
578 mechanical horseback riding on gait and balance ability in stroke patients. *Ann*  
579 *Rehabil Med* 2012; 36: 762–9.

580 Heussen N, Häusler M. Equine-Assisted Therapies for Children With Cerebral Palsy:  
581 A Meta-analysis. *Pediatrics* 2022; 150: e2021055229.

582 Hong QN, Fàbregues S, Bartlett G, Boardman F, Cargo M, Dagenais P, et al. The  
583 Mixed Methods Appraisal Tool (MMAT) version 2018 for information professionals  
584 and researchers. *Educ Inf* 2018; 34: 285–91.

585 Hyun C, Kim K, Lee S, Ko N, Lee IS, Koh SE. The Short-term Effects of  
586 Hippotherapy and Therapeutic Horseback Riding on Spasticity in Children with  
587 Cerebral Palsy: A Meta-analysis. *Pediatr Phys Ther* 2022; 34: 172–8.

588 Hyun GJ, Jung TW, Park JH, Kang KD, Kim SM, Son YD, et al. Changes in Gait  
589 Balance and Brain Connectivity in Response to Equine-Assisted Activity and Training  
590 in Children with Attention Deficit Hyperactivity Disorder. *J Altern Complement Med*  
591 2016; 22: 286–93.

592 Kim H, Her JG, Ko J. Effect of horseback riding simulation machine training on trunk  
593 balance and gait of chronic stroke patients. *J Phys Ther Sci* 2014; 26: 29–32.

594 Kim HS, Lee CW, Lee IS. Comparison between the Effects of Horseback Riding  
595 Exercise and Trunk Stability Exercise on the Balance of Normal Adults. *J Phys Ther*  
596 *Sci* 2014; 26: 1325–7.

597 Kim P, Warren S, Madill H, Hadley M. Quality of life of stroke survivors. *Int J Ther*  
598 *Rehabil* 1999; 12: 43.

599 Kim SR, Cho SH, Kim JW, Lee H-C, Brien M, Cho BJ. Effects of horseback riding  
600 exercise therapy on background electroencephalograms of elderly people. *J Phys*  
601 *Ther Sci* 2015; 27: 2373–2376.

602 Kim YN, Lee DK. Effects of horse-riding exercise on balance, gait, and activities of  
603 daily living in stroke patients. *J Phys Ther Sci* 2015; 27: 607–9.

604 Kleim JA, Jones TA. Principles of experience-dependent neural plasticity:  
605 Implications for rehabilitation after brain damage. *J Speech, Lang Hear Res* 2008; 51:  
606 225–39.

607 Krakauer JW, Carmichael ST, Corbett D, Wittenberg GF. Getting neurorehabilitation

right: What can be learned from animal models? *Neurorehabil Neural Repair* 2012; 26: 923–31.

Kwon J-Y, Chang HJ, Yi S-H, Lee JY, Shin H-Y, Kim Y-H. Effect of hippotherapy on gross motor function in children with cerebral palsy: a randomized controlled trial. *J Altern Complement Med* 2015; 21: 15–21.

Lechner HE, Kakebeeke TH, Hegemann D, Baumberger M. The Effect of Hippotherapy on Spasticity and on Mental Well-Being of Persons With Spinal Cord Injury. *Arch Phys Med Rehabil* 2007; 88: 1241–8.

Lee C-W, Kim SG, Yong MS. Effects of Hippotherapy on Recovery of Gait and Balance Ability in Patients with Stroke. *J Phys Ther Sci* 2014; 26: 309–311.

Lee D, Lee S, Park J. Effects of Indoor Horseback Riding and Virtual Reality Exercises on the Dynamic Balance Ability of Normal Healthy Adults. *J Phys Ther Sci* 2014; 26: 1903–5.

Lee DK, Kim EK. The influence of horseback riding training on the physical function and psychological problems of stroke patients. *J Phys Ther Sci* 2015; 27: 2739–41.

Lee JW, Han A, Kim K. Effects of rehabilitative horse riding on the Sit-to-Stand action of the adolescent with brain lesions. *J Exerc Rehabil* 2014; 10: 31–4.

Lee N, Park S, Kim J. Effects of hippotherapy on brain function, BDNF level, and physical fitness in children with ADHD. *J Exerc Nutr Biochem* 2015; 6: 115–21.

Lee N, Park S, Kim J. Hippotherapy and neurofeedback training effect on the brain function and serum brain-derived neurotrophic factor level changes in children with attention-deficit or/and hyperactivity disorder. *J Exerc Nutr Biochem* 2017; 21: 35–42.

Lohse KR, Lang CE, Boyd LA. Is more better? Using meta-data to explore dose-

631 response relationships in stroke rehabilitation. *Stroke* 2014; 45: 2053–8.

632 Minet LR, Peterson E, Von Koch L, Ytterberg C. Occurrence and Predictors of Falls  
633 in People with Stroke: Six-Year Prospective Study. *Stroke* 2015; 46: 2688–90.

634 Murphy TH, Corbett D. Plasticity during stroke recovery: From synapse to behaviour.  
635 *Nat Rev Neurosci* 2009; 10: 861–72.

636 Olney SJ, Richards CL. Hemiparetic gait following stroke . Part I : Characteristics.  
637 *Gait Posture* 1996; 4: 136–48.

638 Ottiger B, Van Wegen E, Keller K, Nef T, Nyffeler T, Kwakkel G, et al. Getting into a  
639 “Flow” state: a systematic review of flow experience in neurological diseases. *J*  
640 *Neuroeng Rehabil* 2021; 18: 1–21.

641 Page MJ, McKenzie JE, Bossuyt PM, Boutron I, Hoffmann TC, Mulrow CD, et al. The  
642 PRISMA 2020 statement: An updated guideline for reporting systematic reviews. *Int J*  
643 *Surg* 2021; 88: 105906.

644 Park J, Lee S, Lee J, Lee D. The effects of horseback riding simulator exercise on  
645 postural balance of chronic stroke patients. *J Phys Ther Sci* 2013; 25: 1169–72.

646 Park JH, Shurtleff T, Engsberg J, Rafferty S, You JY, You IY, et al. Comparison  
647 between the robo-horse and real horse movements for hippotherapy. *Biomed Mater*  
648 *Eng* 2014; 24: 2603–10.

649 Pekna M, Pekny M, Nilsson M. Modulation of Neural Plasticity as a Basis for Stroke  
650 Rehabilitation. 2012: 2819–28.

651 Pohl P, Carlsson G, Bunketorp Käll L, Nilsson M, Blomstrand C. A qualitative  
652 exploration of post-acute stroke participants’ experiences of a multimodal intervention  
653 incorporating horseback riding. *PLoS One* 2018; 13: 1–18.



654 Portaro S, Cacciola A, Naro A, Cavallaro F, Gemelli G, Aliberti B, et al. Can  
655 Individuals with Down Syndrome Benefit from Hippotherapy? An Exploratory Study  
656 on Gait and Balance. *Dev Neurorehabil* 2020; 23: 337–42.

657 Rigby BR, Grandjean PW. The Efficacy of Equine-Assisted Activities and Therapies  
658 on Improving Physical Function. *J Altern Complement Med* 2016; 22: 9–24.

659 Solomonow-Avnon D, Mawase F. The dose and intensity matter for chronic stroke. *J*  
660 *Neurol Neurosurg Psychiatry* 2019; 90: 1187–8.

661 Stergiou A, Tzoufi M, Ntzani E, Varvarousis D, Beris A, Ploumis A. Therapeutic  
662 Effects of Horseback Riding Interventions: A Systematic Review and Meta-analysis.  
663 *Am J Phys Med Rehabil* 2017; 96: 717–25.

664 Sung YH, Kim CJ, Yu BK, Kim KM. A hippotherapy simulator is effective to shift  
665 weight bearing toward the affected side during gait in patients with stroke.  
666 *NeuroRehabilitation* 2013; 33: 407–12.

667 Sunwoo H, Chang WH, Kwon J-Y, Kim T-W, Lee J-Y, Kim Y-H. Hippotherapy in adult  
668 patients with chronic brain disorders: a pilot study. *Ann Rehabil Med* 2012; 36: 756–  
669 61.

670 Tabares C, Vicente F, Sánchez S, Aparicio A, Alejo S, Cubero J. Quantification of  
671 hormonal changes by effects of hippotherapy in the autistic population. *Neurochem J*  
672 2012; 6: 311–6.

673 Uchiyama H, Ohtani N, Ohta M. Three-dimensional analysis of horse and human  
674 gaits in therapeutic riding. *Appl Anim Behav Sci* 2011; 135: 271–6.

675 Viruega H, Galy C, Loriette C, Jacquot S, Houpeau JL, Gaviria M. Breast Cancer:  
676 How Hippotherapy Bridges the Gap between Healing and Recovery—A Randomized

677 Controlled Clinical Trial. *Cancers (Basel)* 2023; 15: 1317.

678 Viruega H, Imbernon C, Chausson N, Altarcha T, Aghasaryan M, Soumah D, et al.

679 Neurorehabilitation through Hippotherapy on Neurofunctional Sequels of Stroke:

680 Effect on Patients' Functional Independence, Sensorimotor/Cognitive Capacities and

681 Quality of Life, and the Quality of Life of Their Caregivers—A Study Protocol. *Brain*

682 *Sci* 2022; 12: 619.

683 Vive S, Bunketorp-käll L, Carlsson G. Experience of enriched rehabilitation in the

684 chronic phase of stroke. *Disabil Rehabil* 2022; 44: 412–9.

685 Ward J, Hovey A, Brownlee K. Mental health benefits of mounted equine-assisted

686 therapies: A scoping review. *Heal Soc Care Community* 2022: 1–16.

687 Ward NS, Brander F, Kelly K. Intensive upper limb neurorehabilitation in chronic

688 stroke: Outcomes from the Queen Square programme. *J Neurol Neurosurg*

689 *Psychiatry* 2019; 90: 498–506.

690 Yoo JH, Oh Y, Jang B, Song J, Kim J, Kim S, et al. The effects of equine-assisted

691 activities and therapy on resting-state brain function in attention-deficit/hyperactivity

692 disorder: A pilot study. *Clin Psychopharmacol Neurosci* 2016; 14: 357–64.
